# Supplementary material
Source: Springer Nature journal article supplement (https://www.springermedizin.de/resource/supplementary/12865_2008_257_MOESM1_ESM.pdf/9427614)

A.

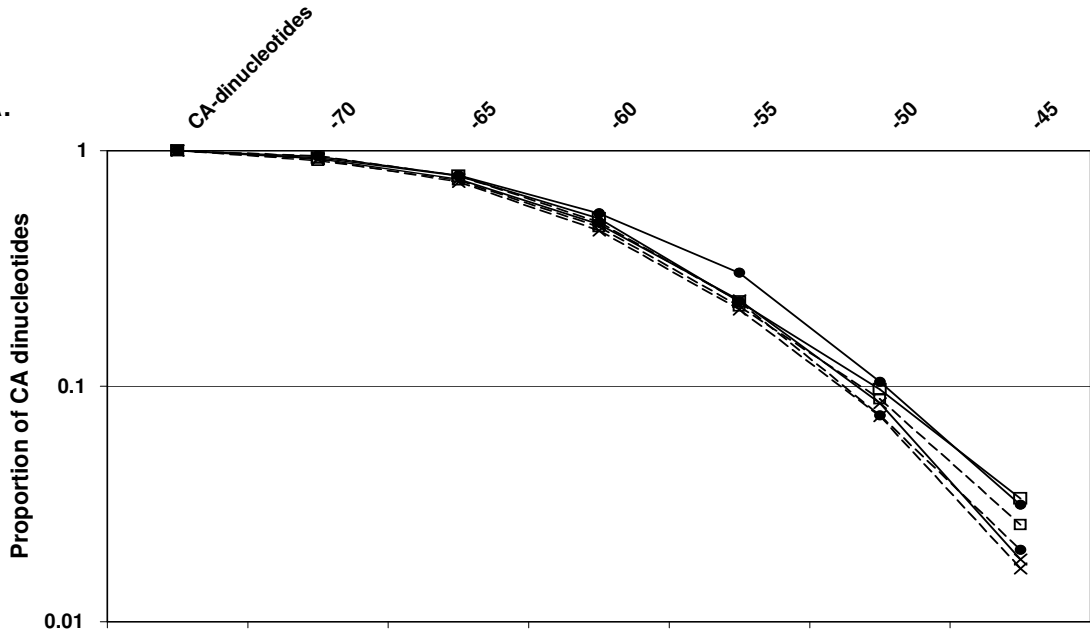

B.

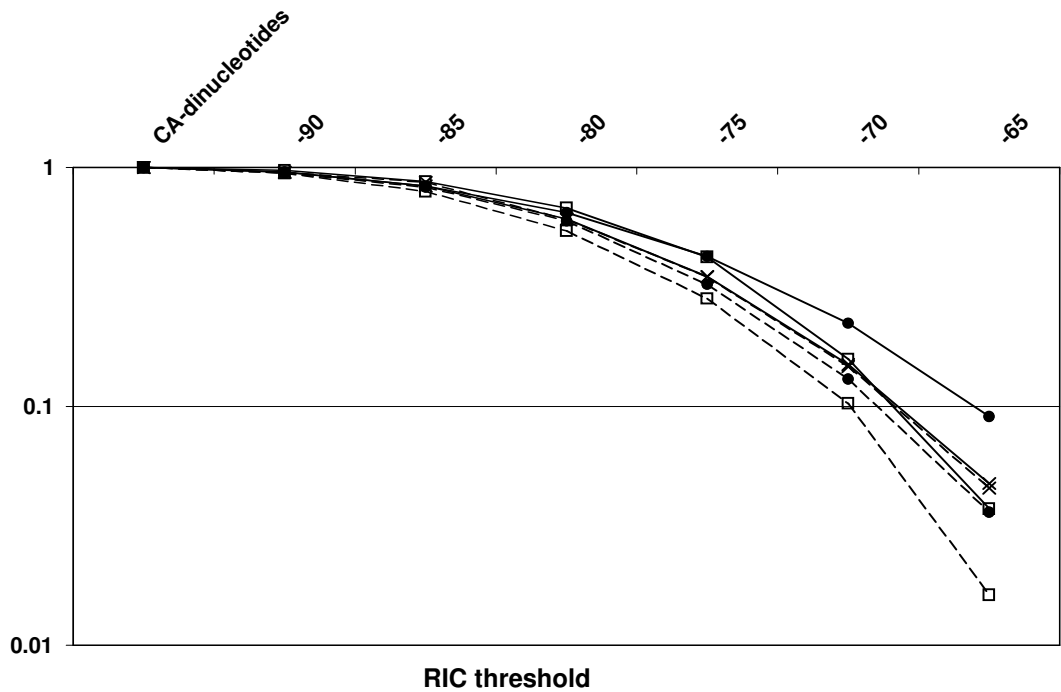

RIC threshold

Supplement: MOESM1 [file 9427614]
